# Supplementary material for: Increased cellular immune responses and CD4+ T-cell proliferation correlate with reduced plasma viral load in SIV challenged recombinant simian varicella virus - simian immunodeficiency virus (rSVV-SIV) vaccinated rhesus macaques
Source: PubMed Central journal article supplement (PMC3485174; doi:10.1186/1743-422x-9-160), 2012-08-13
Supplement: 1743-422X-9-160-S1.pdf [file 1743-422X-9-160-S1.pdf]

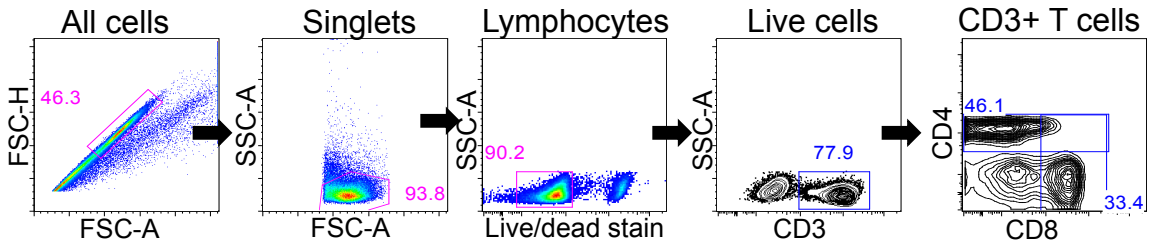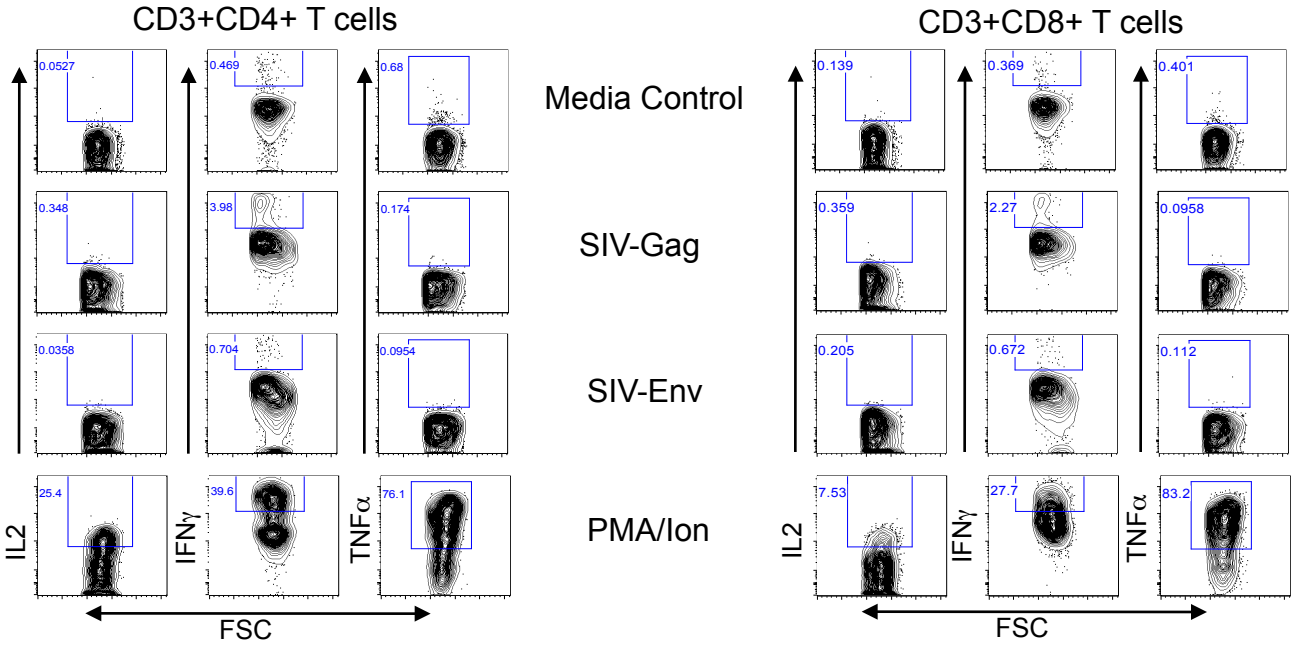

Supplementary Figure S1
